# Supplementary material
Source: Springer Nature journal article supplement (https://www.springermedizin.de/resource/supplementary/13018_2010_230_MOESM6_ESM.pdf/9636594)

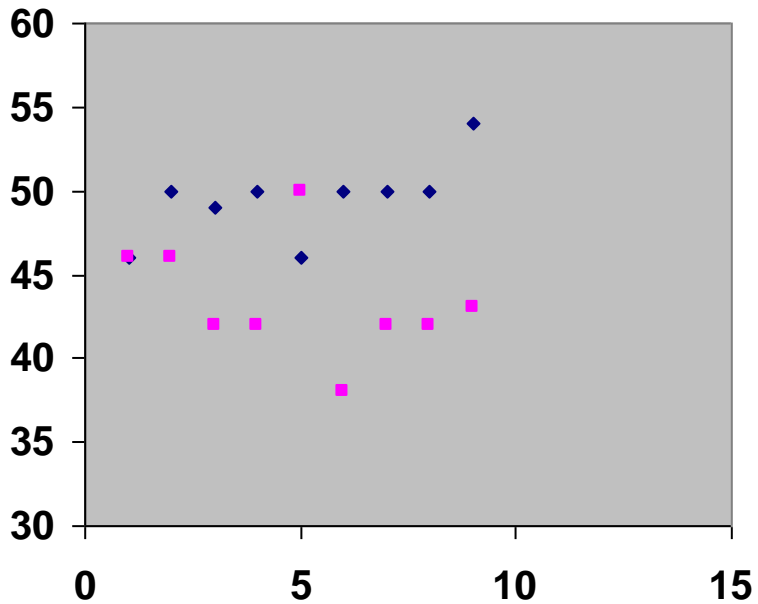

Supplement: MOESM6 [file 9636594]
